# Supplementary material for: Clustering of fMRI data: the elusive optimal number of clusters
Source: PeerJ journal article supplement (doi:10.7717/peerj.5416), 2018-10-03
Supplement: Seghier_SupplementaryFigures_All_v03.pdf [file Seghier_SupplementaryFigures_All_v03.pdf]

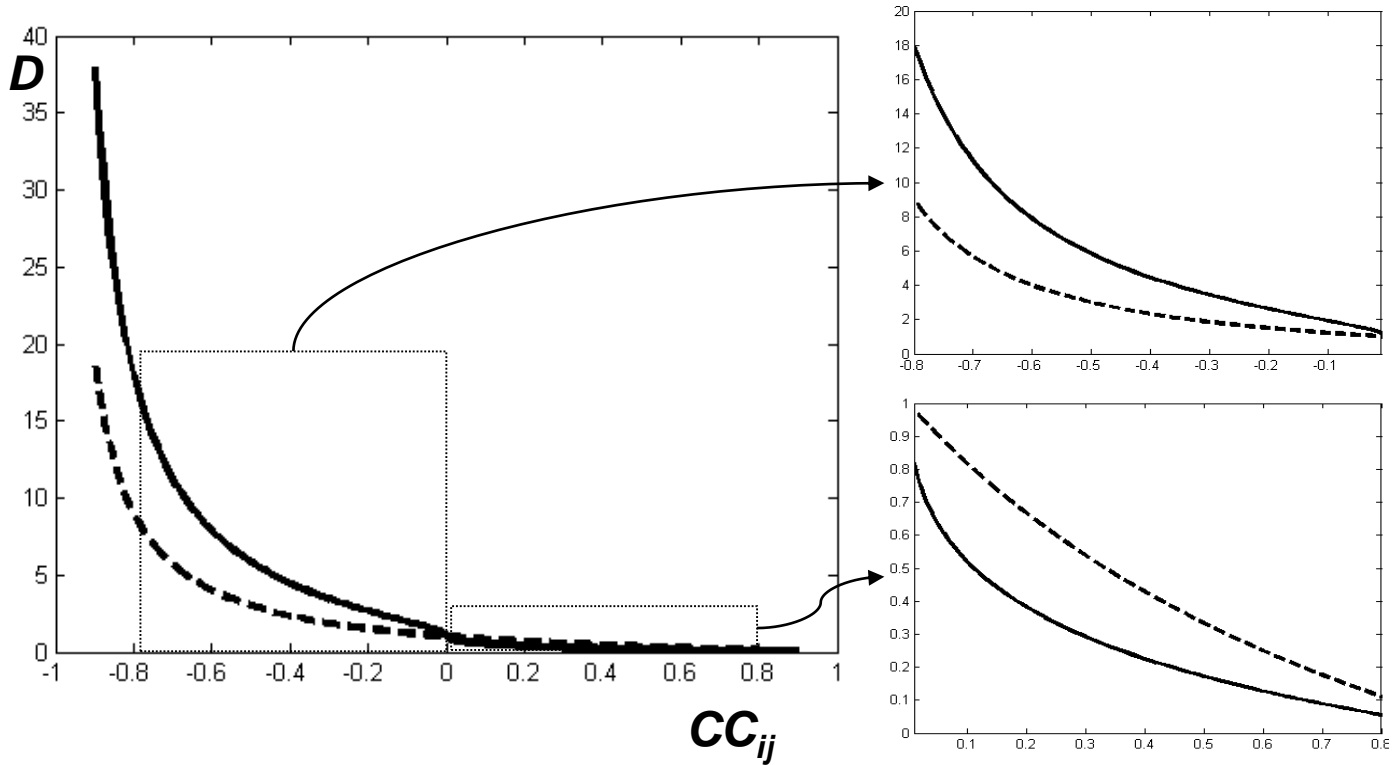

### Supplementary Figure 1:

(left) similarity measure ( $D$ ) as a function of the cross-correlation coefficient ( $CC_{ij}$ ) using Equation (4) (dashed line) and the new formula in Equation (5) (solid line). (right) zoom in two parts of the plot (top: negative correlation; bottom: positive correlation).

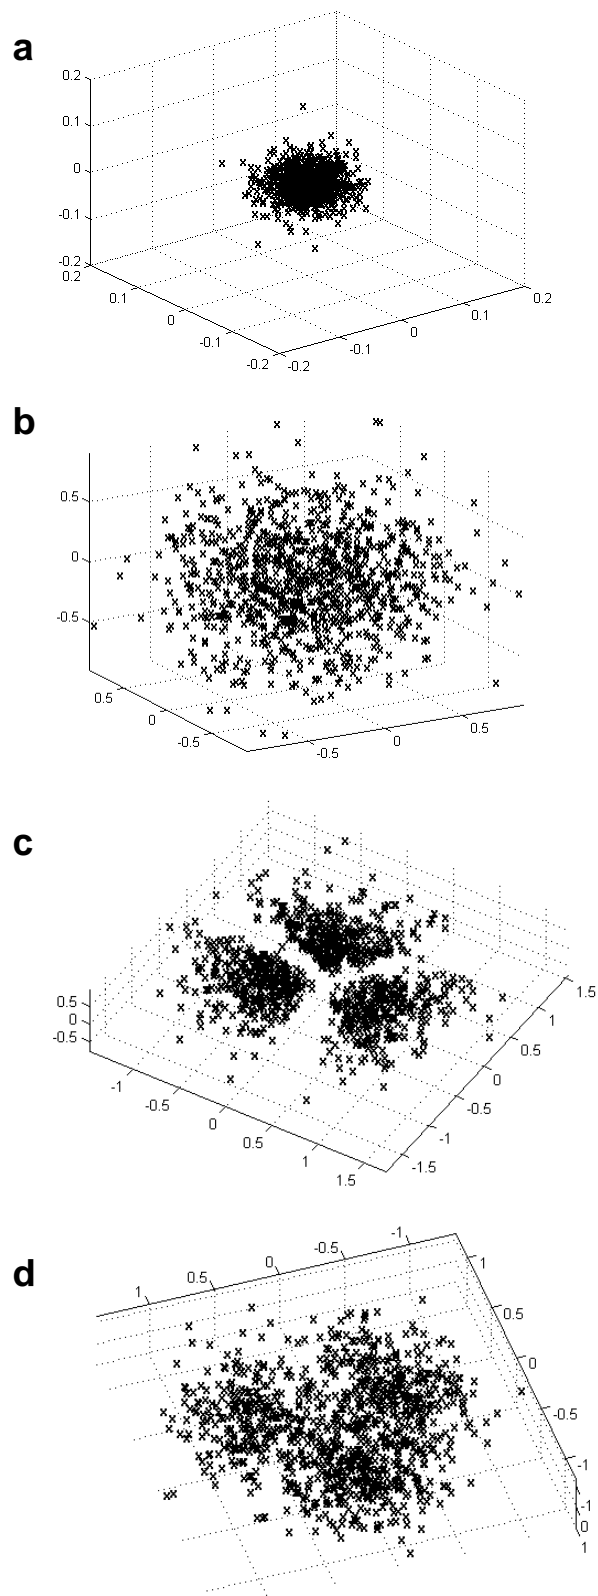

## Supplementary Figure 2:

MDS 3D-plots of the simulated data: the 1-cluster dataset (a), the n-cluster dataset (b), the 3-cluster dataset with low ( $\sigma=1$ ) noise levels (c), and the 3-cluster dataset with high ( $\sigma=4$ ) noise levels (D).

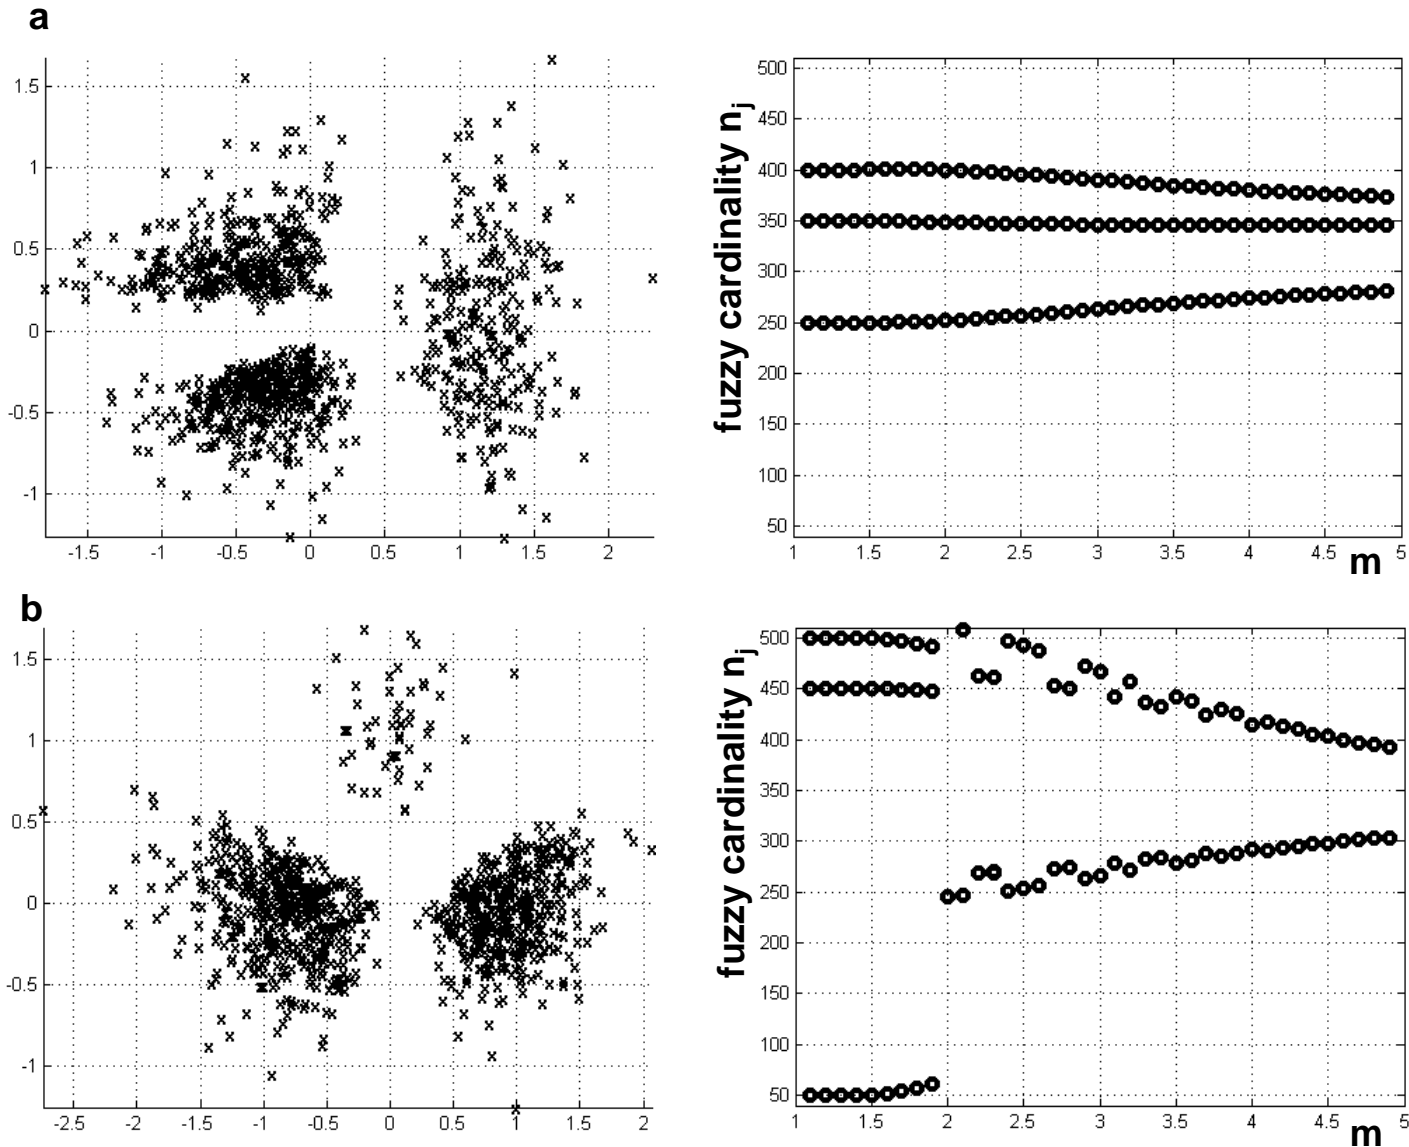

### Supplementary Figure 3:

illustrates the influence of the fuzziness degree  $m$ . (a) a well-balanced dataset with 3 clusters: MDS 2D-plot of all datapoints (left) and the fuzzy cardinality of each obtained cluster at different  $m$  values (right). (b) a 3-cluster dataset with 2 dominant clusters: MDS 2D-plot of all datapoints (left) showing a cluster with small number of datapoints (less than 5% of the whole dataset), and the fuzzy cardinality of the three identified clusters at different  $m$  values (right). In (a), FCM was able to identify the three clusters at different  $m$  values, whereas in (b) the smaller cluster was not identified by FCM at higher  $m$  values (e.g.  $m > 3$ ).
